# Supplementary material for: AMPA receptor antagonist perampanel affects glioblastoma cell growth and glutamate release in vitro
Source: PubMed Central journal article supplement (PMC6361447; doi:10.1371/journal.pone.0211644), 2019-02-04
Supplement: pone.0211644.s001.pdf [file pone.0211644.s001.pdf]

# Supporting Information

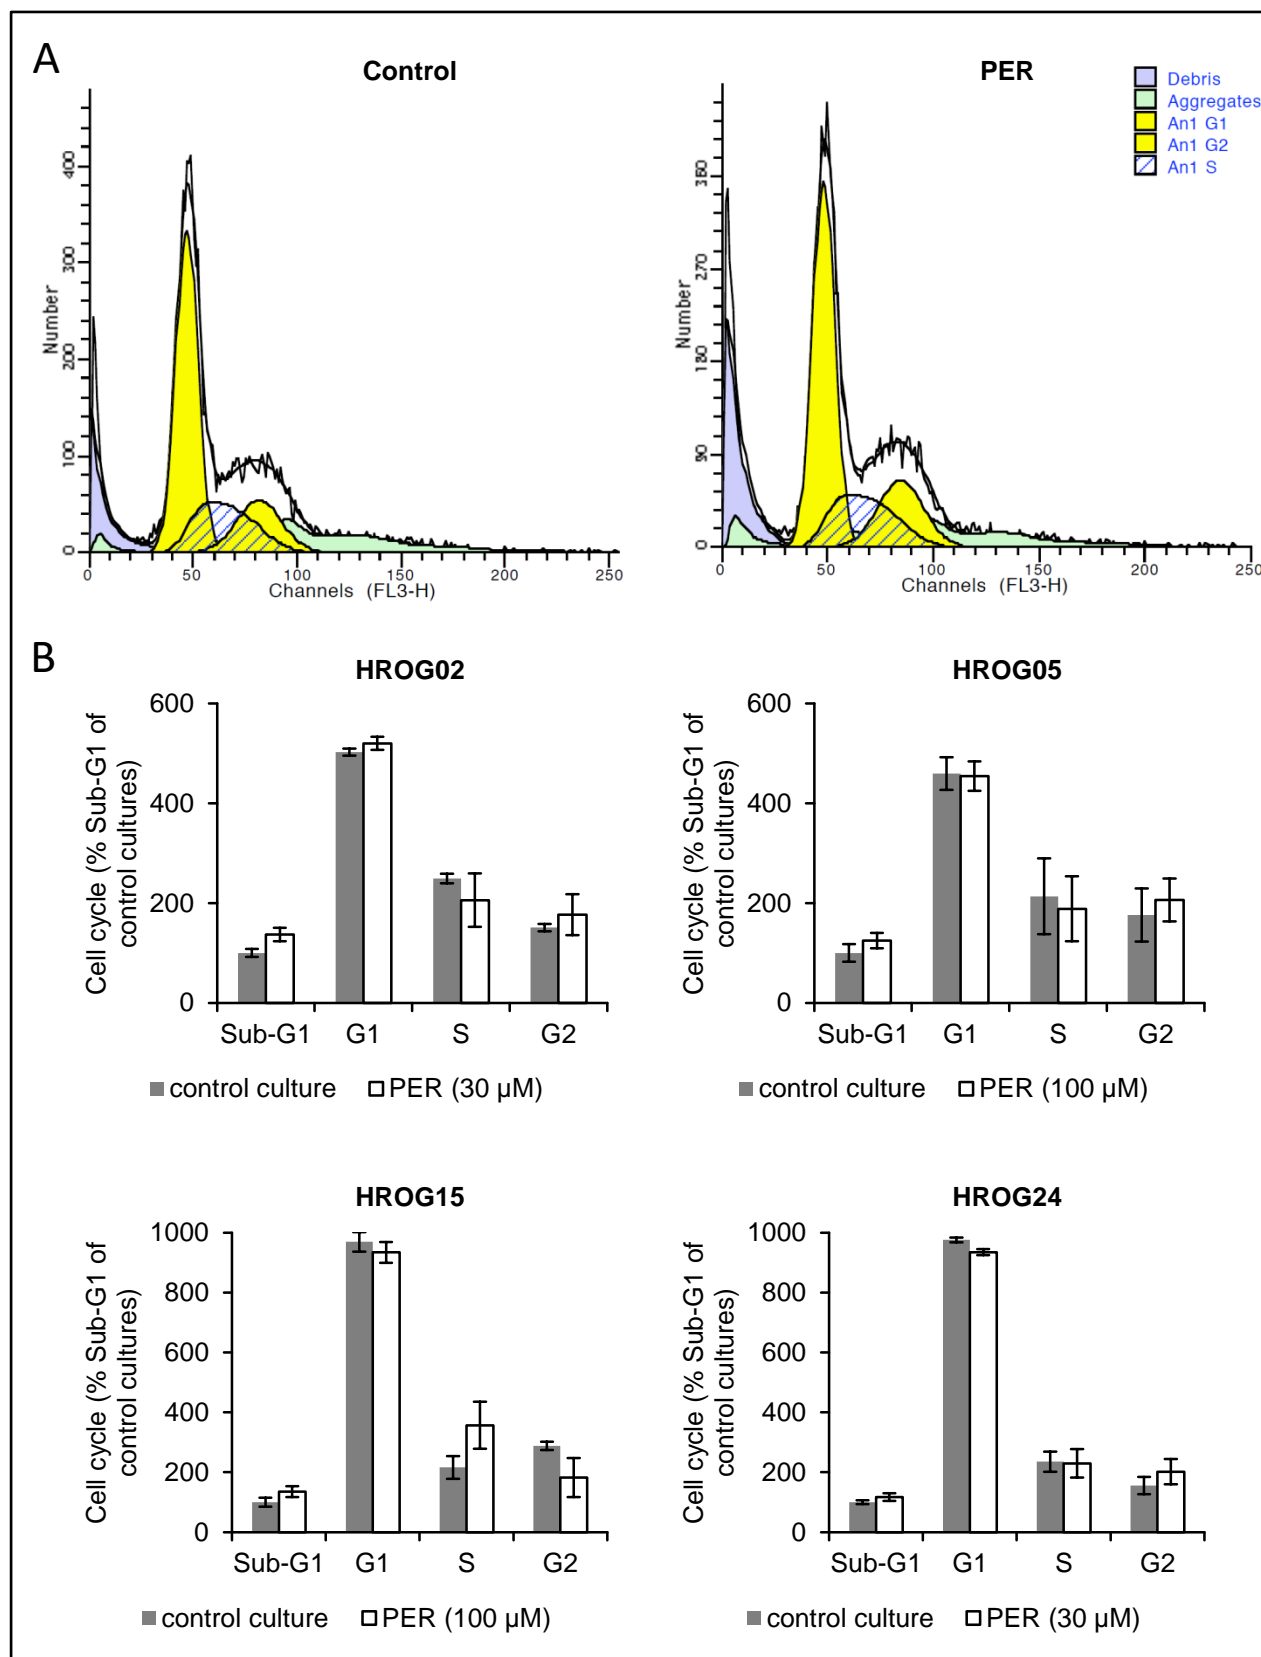

**Supplementary Figure 1:** Glioblastoma cells growing in 6-well plates in complete culture medium were exposed to PER for 48 h at the indicated doses. Processing of the cells after cultivation is described in details in the Materials and Methods sections of the manuscript. **A** A cytofluorometric analysis was performed employing a FACSCalibur cytometer. The cell cycle distribution was calculated using software tools CellQuest and ModFit LT (HROG02 plots are shown as example). **B** Data from  $n \geq 5$  separate samples were used to calculate mean values  $\pm$  SEM. No significant changes were determined by employing a Mann-Whitney U-test (control vs. PER-treated cultures).
